# Supplementary material
Source: PubMed Central journal article supplement (PMC6439607)
Supplement: jamapediatr-173-153-s001.pdf [file jamapediatr-173-153-s001.pdf]

## Supplementary Online Content

Xu G, Strathearn L, Liu B, et al. Prevalence and treatment patterns of autism spectrum disorder in the United States, 2016. *JAMA Pediatr*. Published online December 3, 2018. doi:10.1001/jamapediatrics.2018.4208

**eTable.** Weighted multinomial logistic regression models for mutually exclusive combinations of treatment types in US children with current autism spectrum disorder (ASD)

This supplementary material has been provided by the authors to give readers additional information about their work.

**eTable.** Weighted multinomial logistic regression models for mutually exclusive combinations of treatment types in US children with current autism spectrum disorder (ASD)

| Characteristic                        | Behavioral treatment only        |         | Medications only                 |         | Both behavioral and medication treatments |         |
|---------------------------------------|----------------------------------|---------|----------------------------------|---------|-------------------------------------------|---------|
|                                       | Odds ratio (95% CI) <sup>a</sup> | P value | Odds ratio (95% CI) <sup>a</sup> | P value | Odds ratio (95% CI) <sup>a</sup>          | P value |
| <b>Age, years</b>                     |                                  |         |                                  |         |                                           |         |
| <b>3-5</b>                            | 1.00 [reference]                 | /       | 1.00 [reference]                 | /       | 1.00 [reference]                          | /       |
| <b>6-11</b>                           | 0.43 (0.18-1.02)                 | 0.05    | 10.90 (0.44- 270)                | 0.14    | 2.95 (0.81-10.7)                          | 0.10    |
| <b>12-17</b>                          | 0.22 (0.10-0.47)                 | <0.001  | 16.40 (0.62- 436)                | 0.09    | 1.66 (0.50-5.52)                          | 0.41    |
| <b>Sex</b>                            |                                  |         |                                  |         |                                           |         |
| <b>Male</b>                           | 1.00 [reference]                 | /       | 1.00 [reference]                 | /       | 1.00 [reference]                          | /       |
| <b>Female</b>                         | 1.37 (0.75-2.51)                 | 0.31    | 0.33 (0.12-0.95)                 | 0.04    | 0.62 (0.30-1.29)                          | 0.20    |
| <b>Race/ethnicity</b>                 |                                  |         |                                  |         |                                           |         |
| <b>Hispanic</b>                       | 1.40 (0.50-3.87)                 | 0.52    | 2.47 (0.68-9.01)                 | 0.17    | 0.80 (0.26-2.45)                          | 0.70    |
| <b>Non-Hispanic White</b>             | 1.00 [reference]                 | /       | 1.00 [reference]                 | /       | 1.00 [reference]                          | /       |
| <b>Non-Hispanic Black</b>             | 0.97 (0.44-2.16)                 | 0.95    | 2.43 (0.52-11.4)                 | 0.26    | 1.35 (0.54-3.39)                          | 0.52    |
| <b>Non-Hispanic Asian</b>             | 1.92 (0.69-5.34)                 | 0.21    | 0.96 (0.08-11.5)                 | 0.97    | 0.84 (0.26-2.74)                          | 0.77    |
| <b>Other</b>                          | 0.34 (0.13-0.87)                 | 0.02    | 0.47 (0.14-1.61)                 | 0.23    | 0.64 (0.27-1.48)                          | 0.29    |
| <b>Family income to poverty ratio</b> |                                  |         |                                  |         |                                           |         |
| <b>&lt;1.0</b>                        | 1.00 [reference]                 | /       | 1.00 [reference]                 | /       | 1.00 [reference]                          | /       |
| <b>1.0-1.9</b>                        | 0.42 (0.19-0.93)                 | 0.03    | 0.54 (0.16-1.82)                 | 0.32    | 0.83 (0.35-1.96)                          | 0.67    |
| <b>2.0-3.9</b>                        | 0.67 (0.28-1.62)                 | 0.38    | 0.35 (0.09-1.39)                 | 0.14    | 0.85 (0.33-2.16)                          | 0.73    |
| <b>≥ 4.0</b>                          | 0.51 (0.21-1.26)                 | 0.14    | 0.50 (0.13-1.91)                 | 0.31    | 1.05 (0.34-3.20)                          | 0.93    |
| <b>Insurance Type</b>                 |                                  |         |                                  |         |                                           |         |
| <b>Public Only</b>                    | 0.85 (0.39-1.85)                 | 0.69    | 0.91 (0.27-3.04)                 | 0.88    | 1.98 (0.82-4.75)                          | 0.13    |

| Characteristic            | Behavioral treatment only        |         | Medications only                 |         | Both behavioral and medication treatments |         |
|---------------------------|----------------------------------|---------|----------------------------------|---------|-------------------------------------------|---------|
|                           | Odds ratio (95% CI) <sup>a</sup> | P value | Odds ratio (95% CI) <sup>a</sup> | P value | Odds ratio (95% CI) <sup>a</sup>          | P value |
| <b>Private Only</b>       | 1.00 [reference]                 | /       | 1.00 [reference]                 | /       | 1.00 [reference]                          | /       |
| <b>Private and Public</b> | 1.25 (0.55-2.84)                 | 0.60    | 3.07 (0.76-12.5)                 | 0.12    | 0.70 (0.27-1.82)                          | 0.47    |
| <b>Unspecified</b>        | 0.02 (0.00-0.18)                 | <0.001  | 5.60 (0.49-64.2)                 | 0.17    | 0.11 (0.01-1.21)                          | 0.07    |
| <b>Not Insured</b>        | 0.12 (0.02-0.60)                 | 0.01    | 1.98 (0.25-15.5)                 | 0.52    | 0.04 (0.00-0.34)                          | 0.003   |

**Abbreviations:** ASD, autism spectrum disorder; CI, confidence interval.

<sup>a</sup>Based on mutually exclusive categories, in reference to the category with neither behavioral nor medication treatment. Adjusted simultaneously for all other characteristic variables in the table as well as the state.
